# Supplementary material for: MAX-DOAS observations of formaldehyde and nitrogen dioxide at three sites in Asia and comparison with the global chemistry transport model CHASER
Source: Copernicus journal article supplement (doi:10.5194/acp-2021-815), 2021-10-25
Supplement: Supplementary file 1 [file acp-2021-815-supplement.pdf]

## Supplement

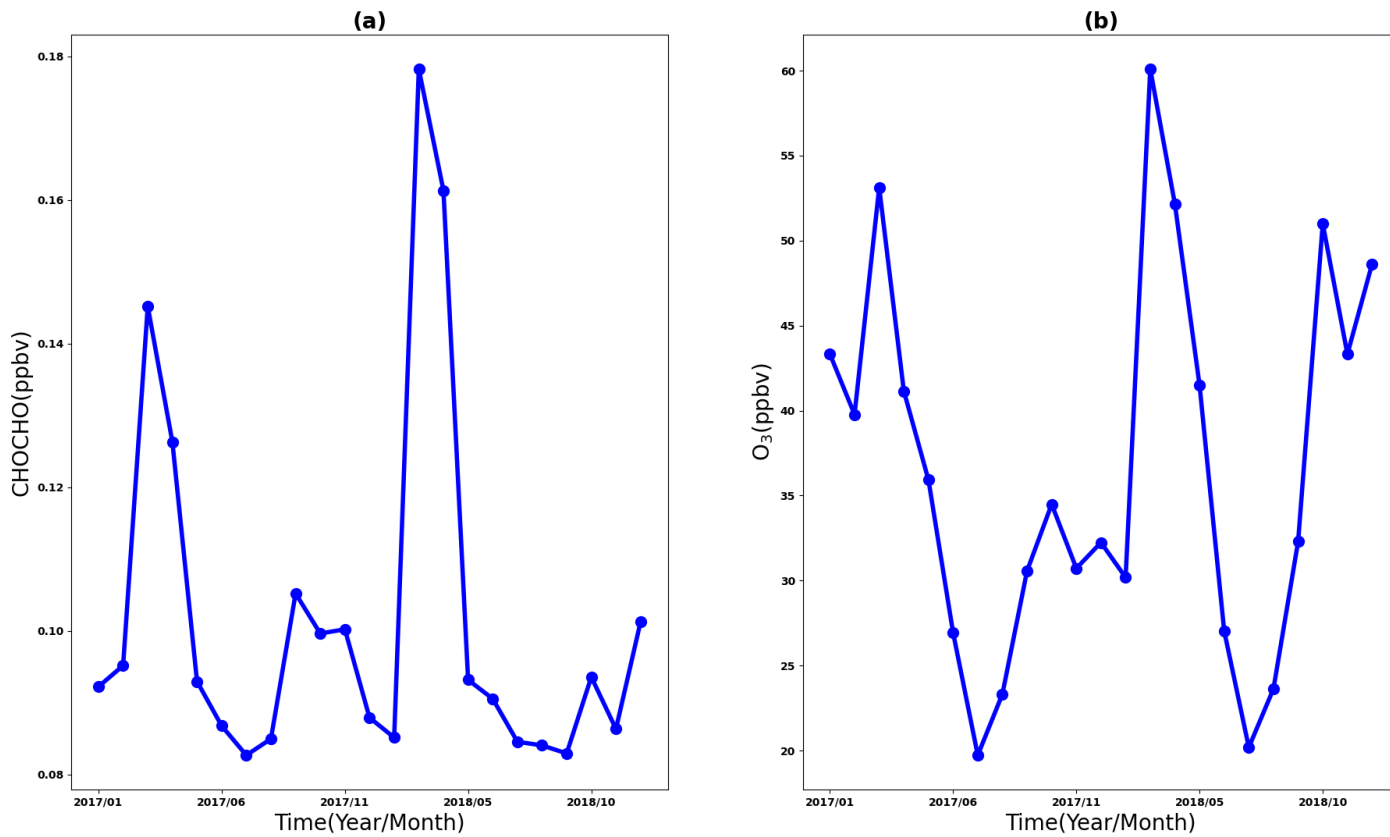

**Figure S1:** The seasonal variations in the glyoxal (CHOCHO) and ozone (O<sub>3</sub>) concentrations in the 0-1 km layer in Phimai, retrieved using the JM2 algorithm.

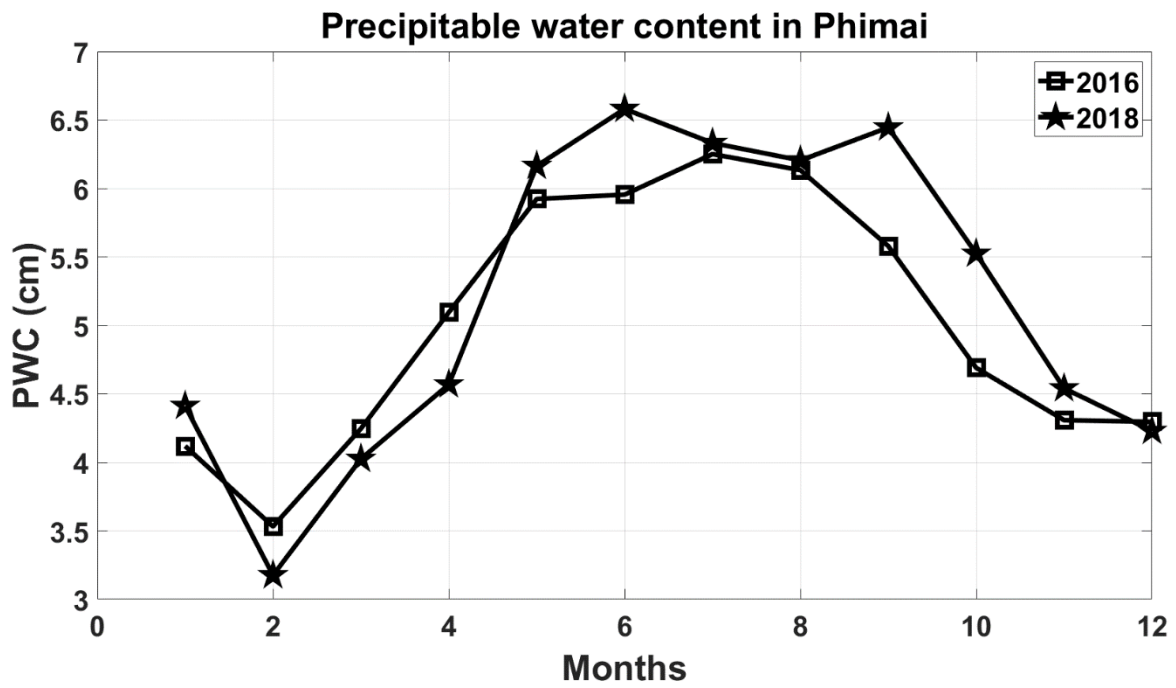

**Figure S2:** The seasonal variations in precipitable water content in Phimai in 2016 and 2018, retrieved from the microwave radiometer observations.
